# Supplementary material
Source: PubMed Central journal article supplement (PMC6362396)
Supplement: joces-132-214072-s1.pdf [file joces-132-214072-s1.pdf]

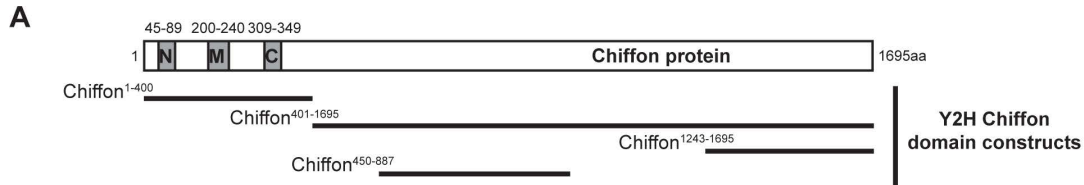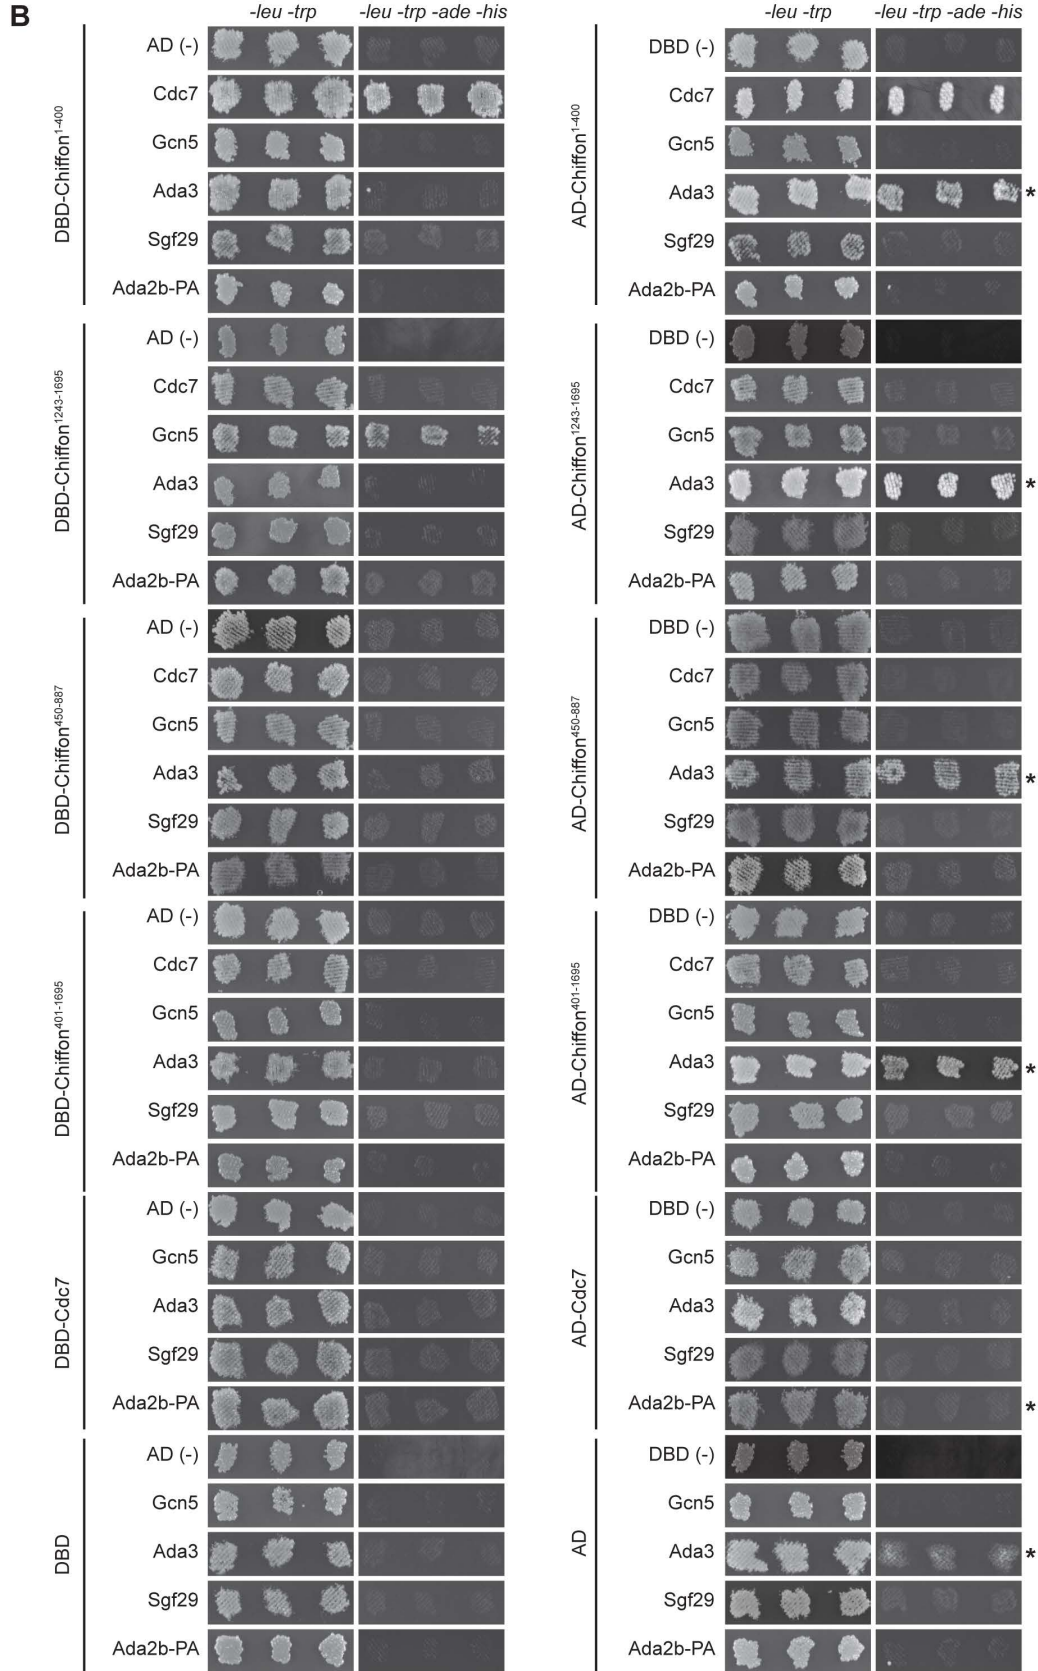

**Figure S1. The N-terminal domain of Chiffon interacts with Cdc7, and the C-terminal domain of Chiffon interacts with Gcn5.** (A) Schematic showing the Chiffon domains tested by yeast two-hybrid analysis. The conserved Dbf4 N, M, and C motifs are indicated by shaded grey boxes. (B) Yeast two-hybrid assay was performed to test the interaction of the CHAT subunits Gcn5, Ada2b-PA, Sgf29, Ada3, and Cdc7 with different Chiffon domains. The Gal4 activating domain (AD) or the Gal4 DNA binding domain (DBD) were fused to the indicated proteins. Empty plasmids expressing only the AD or DBD were used to test for auto-activation of each protein (\*, auto-activation). Cells were patched on media lacking leucine and tryptophan to test for presence of the AD and DBD plasmids, and on media lacking leucine, tryptophan, adenine and histidine to test for interaction. Three independent transformed yeast colonies were patched for each interaction tested.

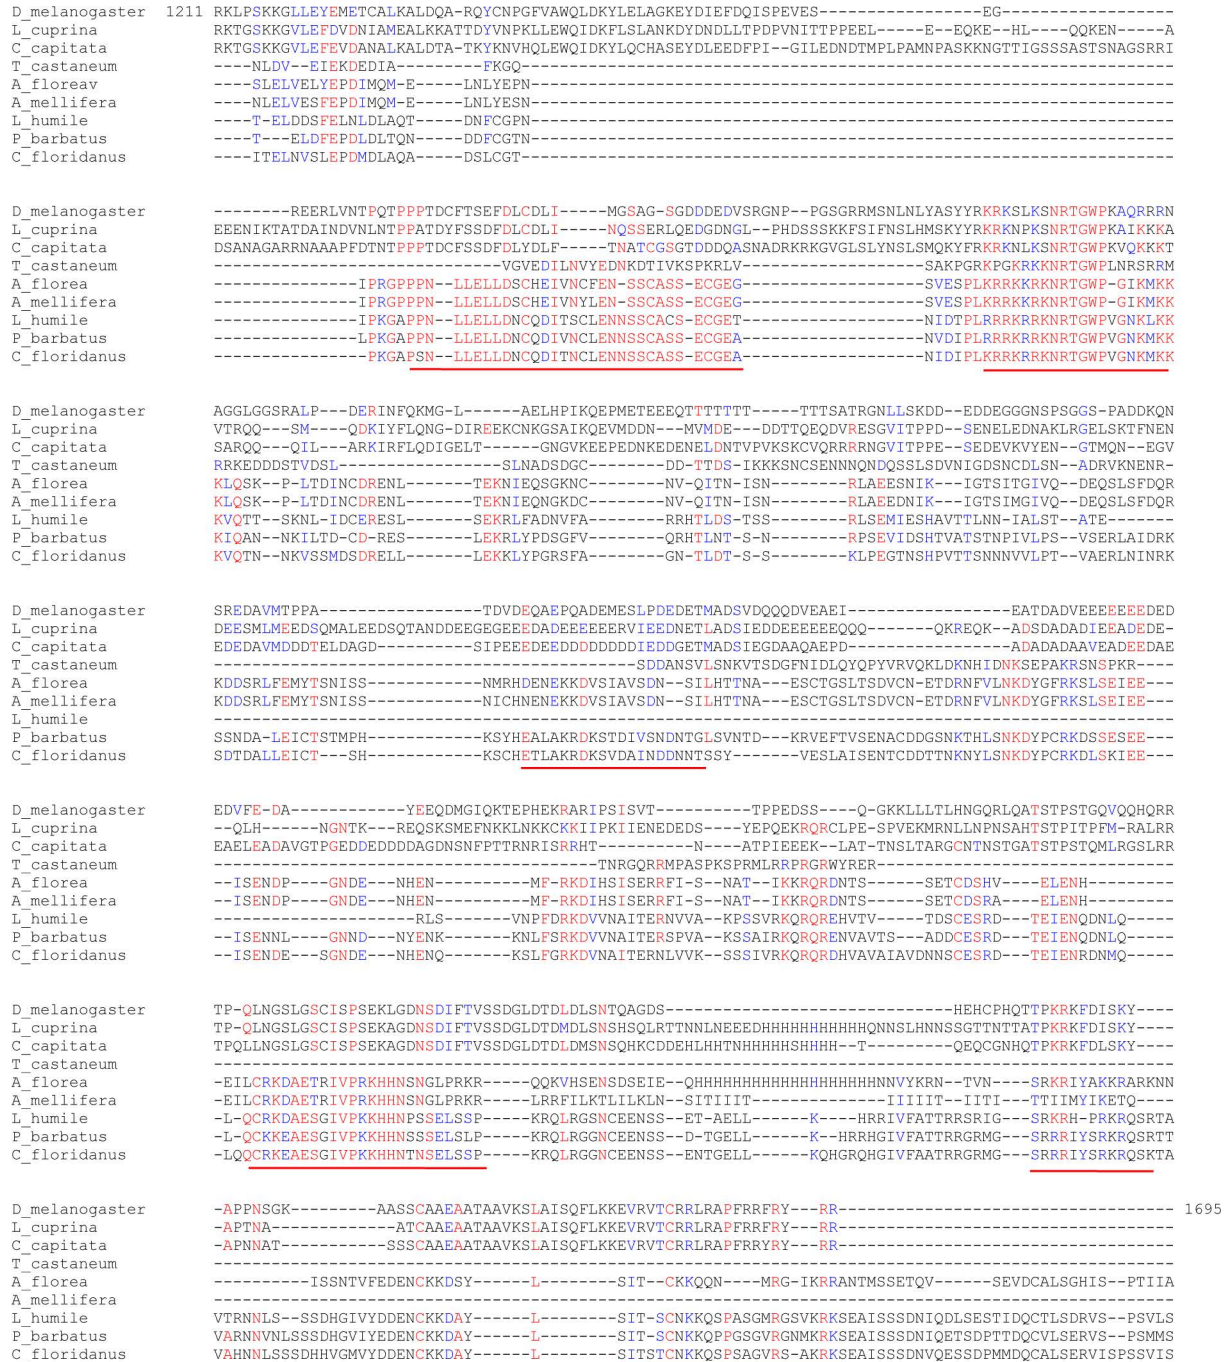

**Figure S2. The C-terminal, Gcn5-binding domain of Chiffon shares regions of conservation within insect species.** Insect Dbf4 homologs were aligned using Clustal Omega. The aligned region contains 1211 – 1695aa of *Drosophila* Chiffon, which includes the region that interacts with Gcn5 by yeast two-hybrid assay (1243 – 1695aa) and by co-immunoprecipitation using recombinant proteins (1400 – 1695aa). Regions of potential conservation within insects are underlined in red. Dbf4 homologs from the following insect species were used to generate this alignment: Diptera: *Drosophila melanogaster*, *Lucilia cuprina* (Australian sheep blowfly) and *Ceratitis capitata* (Mediterranean fruit fly). Coleoptera: *Tribolium castaneum* (Red flour beetle). Hymenoptera: *Apis mellifera* (Western honey bee), *Apis florea* (Dwarf honey bee), *Linepithema humile* (Argentine ant), *Pogonomyrmex barbatus* (Red harvester ant), *Camponotus floridanus* (Florida carpenter ant).

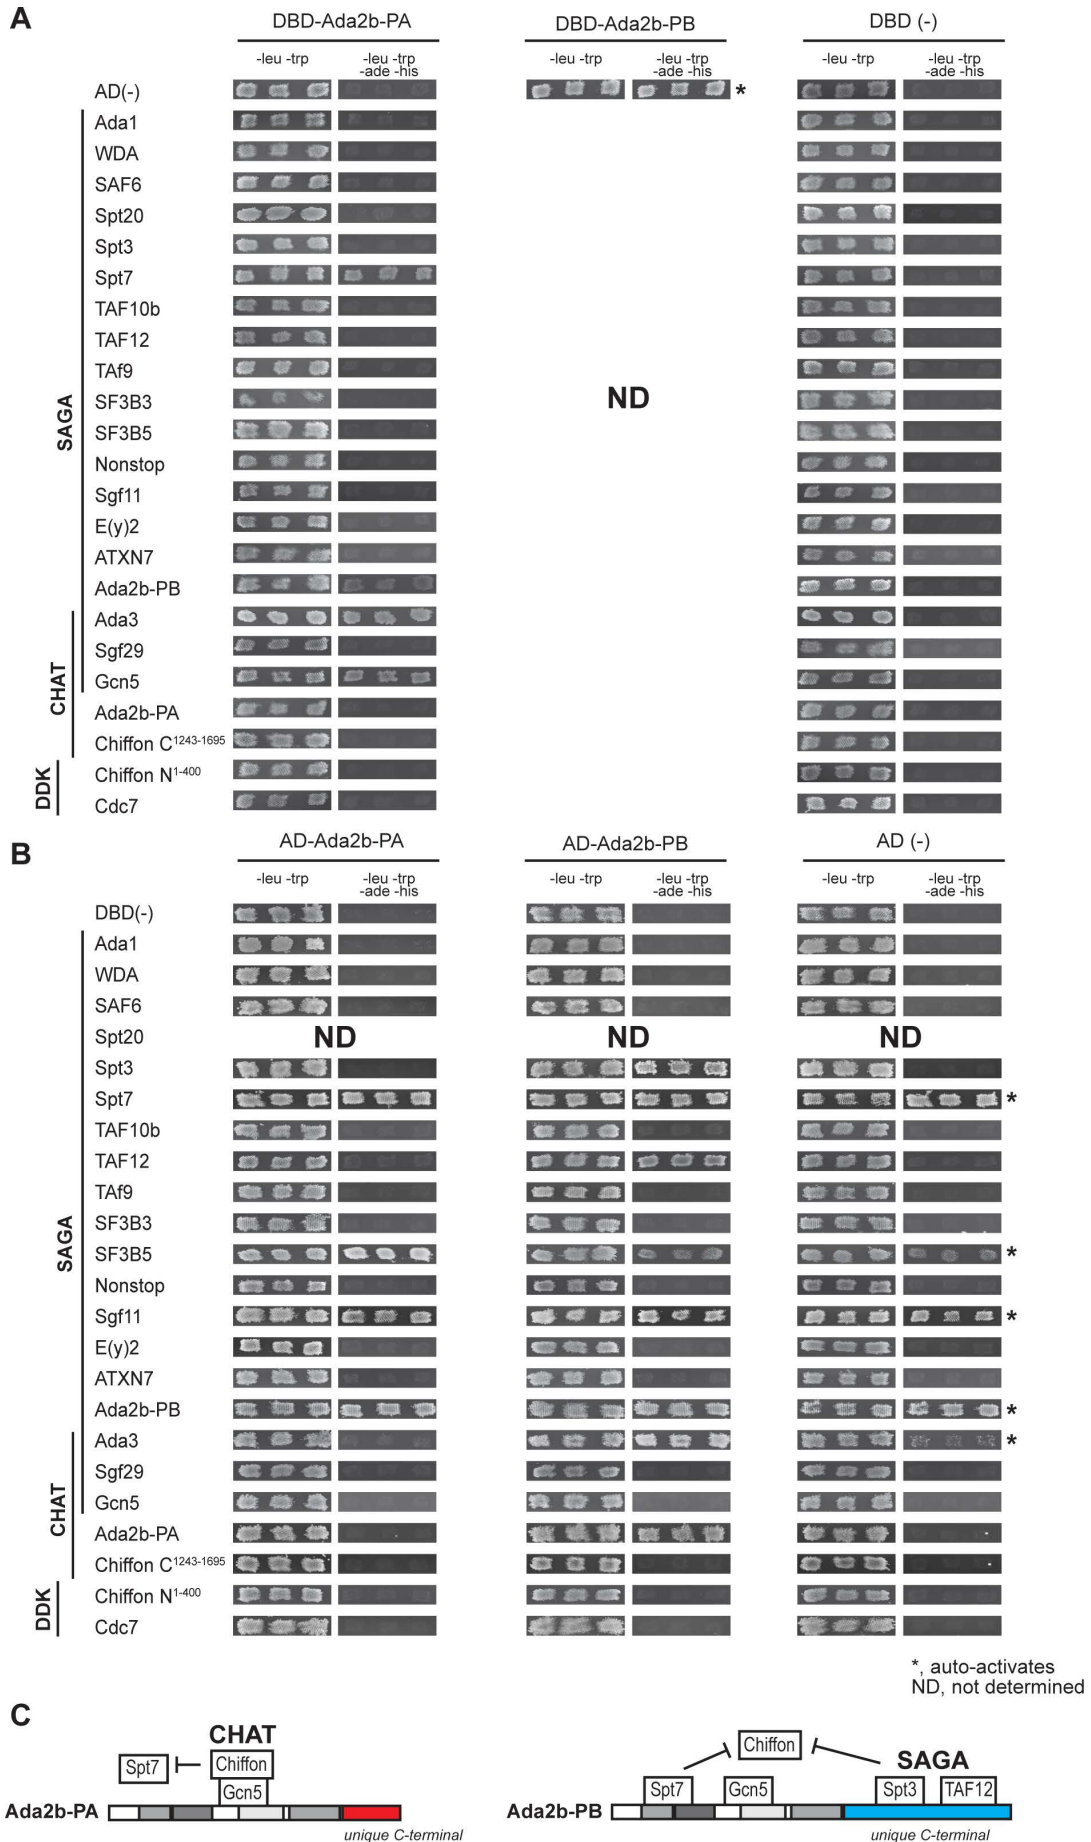

**Figure S3. Ada2b isoforms interact with overlapping and distinct SAGA subunits.** (A, B) Yeast two-hybrid assay was performed to test the interaction of Ada2b-PA or Ada2b-PB with the indicated SAGA subunits, Chiffon domains, and Cdc7. The Gal4 activating domain (AD) or the Gal4 DNA binding domain (DBD) were fused to the indicated proteins. Empty plasmids expressing only the AD or DBD were used to test for auto-activation of each protein (\*, auto-activation). We did not test Ada2b-PB/DBD in combination with other SAGA subunits by yeast two-hybrid because Ada2b-PB auto-activated when fused to the DBD; in contrast, Ada2b-PA did not auto-activate. Cells were patched on media lacking leucine and tryptophan to test for presence of the AD and DBD plasmids, and on media lacking leucine, tryptophan, adenine and histidine to test for interaction. Three independent transformed yeast colonies were patched for each interaction tested. ND, not determined. (C) Model for differential binding of Ada2b isoforms with SAGA or CHAT. Both Ada2b isoforms bind Gcn5 and Ada3 and can interact with Spt7 by yeast two-hybrid; however, only Ada2b-PB associates with Spt7 *in vivo*. By yeast two-hybrid analysis, Ada2b-PB, but not Ada2b-PA, interacts with Spt3 and TAF12. We propose that Ada2b-PB binds Spt3 and TAF12 via its unique C-terminal domain (highlighted in blue), stabilizing association of Spt7 with its common N-terminal domain. Binding of Spt3, TAF12 and Spt7 to Ada2b-PB promotes formation of SAGA and prevents Gcn5 from binding Chiffon, potentially via steric clashes. In contrast, Ada2b-PA does not interact with Spt3 or TAF12 because it contains an alternative C-terminal domain that lacks the necessary binding regions (highlighted in red). Although Ada2b-PA is capable of binding Spt7 via its N-terminal region, this association is destabilized in the absence of Spt3 or TAF12. Instead, in the absence of Spt7 binding, Gcn5 interacts with the C-terminal of Chiffon and promotes CHAT complex formation. It is possible that Chiffon binding to Gcn5 might also prevent Ada2b-PA from binding Spt7. Notably, Ada2b-PB, but not Ada2b-PA, auto-activates expression of the reporter genes when fused to the DBD, suggesting that the unique C-terminal domain of Ada2b-PB may also interact with yeast SAGA subunits. Although by yeast two-hybrid Ada2b-PA and Ada2b-PB showed an interaction in one direction (panel B, AD-Ada2b-PB + DBD-Ada2b-PA), we never observed peptide spectra for Ada2b-PA isoforms in Ada2b-PB purifications (Table S1), suggesting that this interaction does not occur *in vivo*.

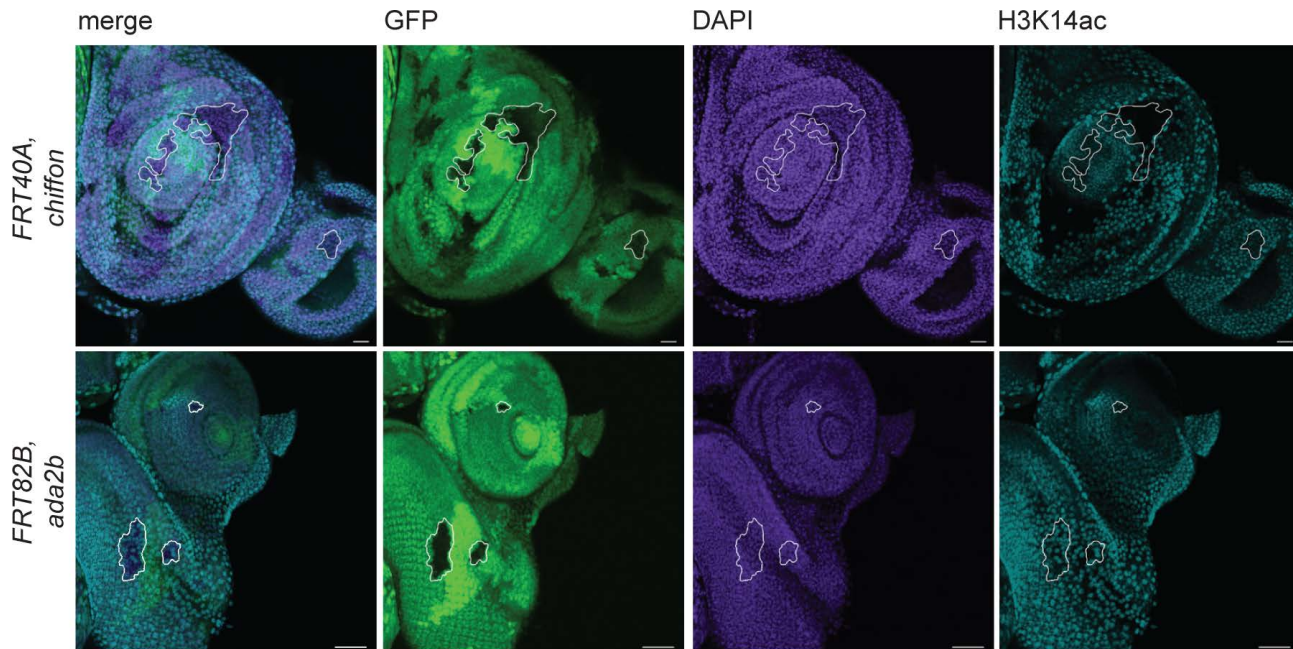

**Figure S4. Chiffon is necessary for histone H3 acetylation in imaginal discs.** Mosaic imaginal discs were generated using the FLP/FRT system for *chiffon*<sup>ETBE3</sup> (n = 10) and *ada2b*<sup>1</sup> (n = 3). Representative maximum intensity projection images for each allele showing  $\alpha$ -H3K14ac and DAPI staining from imaginal discs containing multiple clones, marked by the absence of GFP and outlined in white. Scale bars, 20  $\mu$ m.

**Table S1: Distributed normalized spectral abundance factor (dNSAF) values for MudPIT analysis**

Relative spectral abundance of SAGA, ATAC and CHAT subunits (rows) expressed as dNSAF (distributive normalized spectral abundance factor) in tandem FLAG-HA purifications from S2 cells using the indicated proteins as bait proteins (columns), relative to control purifications from untagged S2 cells (Control 1) or S2 cells expressing non-specific tagged protein CG6459 (Control 2). N or C epitope tagging indicated by -N or -C respectively.

| Subunit  | Complex        | Isoform    | FbgnID      | CGID    | Spt3-C     | Spt20-C    | Ada2b-PB-C | Ada2b-PB-N | Sgf29-C    | Bait protein: |            |            | Cdc7-N     | Control 1  | Control 2 | Length (aa) | MW (Da) | pI  |
|----------|----------------|------------|-------------|---------|------------|------------|------------|------------|------------|---------------|------------|------------|------------|------------|-----------|-------------|---------|-----|
|          |                |            |             |         |            |            |            |            |            | Ada2b-PA-C    | Ada2b-PA-N | Chiffon-C  |            |            |           |             |         |     |
| Ada1     | SAGA           |            | FBgn0051866 | CG31866 | 0.00333243 | 0.00734077 | 0.0220483  | 0.00466854 | 0.00352633 | 0             | 0          | 0          | 0.0000625  | 0          | 0         | 308         | 35399   | 7.5 |
| WDA      | SAGA           |            | FBgn0039067 | CG4448  | 0.00552565 | 0.01554854 | 0.01582185 | 0.00519146 | 0.00334123 | 0             | 0          | 0.00005353 | 0          | 0          | 0         | 743         | 83728   | 6.9 |
| SAF6     | SAGA           |            | FBgn0031281 | CG3883  | 0.00293458 | 0.00660909 | 0.01162017 | 0.0030241  | 0.00201973 | 0             | 0          | 0          | 0          | 0          | 0         | 717         | 79289   | 6.3 |
| Spt20    | SAGA           |            | FBgn0036374 | CG17689 | 0.00351628 | 0.02353081 | 0.00520999 | 0.00355825 | 0.00143588 | 0             | 0          | 0          | 0          | 0          | 0         | 1873        | 200987  | 9.5 |
| Spt3     | SAGA           |            | FBgn0037981 | CG3169  | 0.03087184 | 0.01201779 | 0.0090652  | 0.00291244 | 0.00235701 | 0             | 0          | 0          | 0.00002507 | 0          | 0         | 384         | 43506   | 9   |
| Spt7     | SAGA           |            | FBgn0030874 | CG6506  | 0.01000657 | 0.01604679 | 0.02432069 | 0.00870999 | 0.00590668 | 0             | 0          | 0          | 0          | 0          | 0         | 359         | 39460   | 5.4 |
| TAF10b   | SAGA           |            | FBgn0026324 | CG3069  | 0.00187468 | 0.00106069 | 0.02071581 | 0.00234493 | 0.00070849 | 0             | 0          | 0          | 0          | 0          | 0         | 146         | 15784   | 6.8 |
| TAF12    | SAGA           |            | FBgn0011290 | CG17358 | 0.00192448 | 0.00483938 | 0.00891659 | 0.00242505 | 0.00290922 | 0             | 0          | 0          | 0.00014176 | 0.00006016 | 0         | 160         | 17630   | 8.9 |
| TAF9     | SAGA           |            | FBgn0000617 | CG6474  | 0.00443045 | 0.00824435 | 0.01621665 | 0.00467974 | 0.00213947 | 0             | 0.00026061 | 0.00028613 | 0          | 0.00006925 | 0         | 278         | 29314   | 9.3 |
| Nipped-A | SAGA           |            | FBgn0053554 | CG33554 | 0.00155267 | 0.01114666 | 0.00138525 | 0.00311948 | 0.00227211 | 0             | 0.00007646 | 0.00004198 | 0.00003591 | 0.00016762 | 0         | 3790        | 435332  | 7.8 |
| SF3B3    | SAGA           |            | FBgn0035162 | CG13900 | 0.00890875 | 0.01804809 | 0.03943939 | 0.00822185 | 0.00486846 | 0             | 0.00008857 | 0.00003241 | 0.00001848 | 0.00004707 | 0         | 1227        | 136616  | 5.5 |
| SF3B5    | SAGA           |            | FBgn0040534 | CG11985 | 0.00664134 | 0.01166006 | 0.02551194 | 0.00510183 | 0.00730157 | 0             | 0          | 0          | 0          | 0          | 0         | 85          | 9971    | 6.4 |
| Nonstop  | SAGA           |            | FBgn0013717 | CG4166  | 0.00220729 | 0.00924165 | 0.00023011 | 0.00340519 | 0.00135555 | 0             | 0          | 0          | 0          | 0          | 0         | 496         | 56441   | 8   |
| Sgf11    | SAGA           |            | FBgn0036804 | CG13379 | 0.00637129 | 0.02196486 | 0.00116462 | 0.00652114 | 0.0010555  | 0             | 0          | 0.00005786 | 0          | 0          | 0         | 196         | 21322   | 8.1 |
| E(y)2    | SAGA           |            | FBgn0000618 | CG15191 | 0.00423428 | 0.007973   | 0.00452009 | 0.00384166 | 0.00281641 | 0             | 0          | 0.00044913 | 0          | 0          | 0         | 101         | 11474   | 4.8 |
| ATXN7    | SAGA           |            | FBgn0031420 | CG9866  | 0.0008104  | 0.00344488 | 0.00229205 | 0.00126931 | 0.00151803 | 0             | 0          | 0          | 0          | 0          | 0         | 971         | 104206  | 7   |
| Ada2b-PB | SAGA           | PB (long)  | FBgn0037555 | CG9638  | 0.00280485 | 0.00971015 | 0.04832633 | 0.02245387 | 0.00550658 | 0             | 0          | 0          | 0.00001022 | 0          | 0         | 555         | 62031   | 7.1 |
| Ada3     | SAGA/CHAT/ATAC |            | FBgn0030891 | CG7098  | 0.00181526 | 0.00562621 | 0.02863573 | 0.01100149 | 0.01181362 | 0.03476871    | 0.00762283 | 0.00901306 | 0.00006119 | 0          | 0         | 556         | 59916   | 7.4 |
| Sgf29    | SAGA/CHAT/ATAC |            | FBgn0050390 | CG30390 | 0.0043802  | 0.01039546 | 0.02152324 | 0.01998087 | 0.15014752 | 0.06031126    | 0.01428933 | 0.01417476 | 0.00031392 | 0.00013323 | 0         | 289         | 32116   | 8.6 |
| Gcn5     | SAGA/CHAT/ATAC |            | FBgn0020388 | CG4107  | 0.00340867 | 0.00963828 | 0.02386532 | 0.01426149 | 0.00483478 | 0.02637654    | 0.01265414 | 0.00772935 | 0.00018134 | 0.00002368 | 0         | 813         | 92169   | 8.9 |
| Ada2b-PA | CHAT           | PA (short) | FBgn0037555 | CG9638  | 0          | 0          | 0          | 0          | 0.00196844 | 0.1763971     | 0.01351927 | 0.00846818 | 0.00001357 | 0.00004606 | 0         | 418         | 48316   | 8.8 |
| Chiffon  | CHAT           |            | FBgn0000307 | CG5813  | 0          | 0          | 0          | 0          | 0.00060455 | 0.00117305    | 0.0038109  | 0.02099009 | 0.02004294 | 0.00099012 | 0         | 1711        | 189217  | 8.5 |
| Cdc7     | DDK            |            | FBgn0028360 | CG32742 | 0          | 0          | 0          | 0          | 0          | 0             | 0.000207   | 0.00039772 | 0.00150666 | 0.04154105 | 0         | 700         | 78665   | 9.2 |
| Atac1    | ATAC           |            | FBgn0031876 | CG9200  | 0          | 0          | 0          | 0          | 0.00347668 | 0             | 0          | 0          | 0          | 0          | 356       | 40986       | 5.1     |     |
| Atac2    | ATAC           |            | FBgn0032691 | CG10414 | 0          | 0          | 0          | 0          | 0.00209881 | 0             | 0          | 0          | 0          | 0          | 774       | 89175       | 6       |     |
| D12      | ATAC           |            | FBgn0027490 | CG13400 | 0          | 0          | 0          | 0          | 0.00399154 | 0             | 0          | 0          | 0          | 0          | 969       | 111120      | 9.2     |     |

**Table S2. Fly stocks used in this study.**

| Fly stock                                       | Description                                                                                                                                                         | Genotype                                                                                                                                            | Source/Reference                            |
|-------------------------------------------------|---------------------------------------------------------------------------------------------------------------------------------------------------------------------|-----------------------------------------------------------------------------------------------------------------------------------------------------|---------------------------------------------|
| <i>w</i> <sup>1118</sup>                        | Control untagged stock for embryo co-immunoprecipitations                                                                                                           | <i>w</i> <sup>1118</sup>                                                                                                                            | Bloomington BL3605                          |
| <i>ada2b</i> <sup>1</sup>                       | Null <i>ada2b</i> allele removes both Ada2b splice isoforms                                                                                                         | <i>ada2b</i> <sup>1</sup> / <i>TM3</i> , <i>Sb</i> <sup>1</sup> <i>Ser</i> <sup>1</sup>                                                             | Mattias Mannervik (Qi et al., 2004)         |
| <i>ada2b</i> <sup>842</sup>                     | Null <i>ada2b</i> allele removes both Ada2b splice isoforms                                                                                                         | <i>ada2b</i> <sup>842</sup> / <i>TM3</i> , <i>Sb</i> <sup>1</sup> <i>Ser</i> <sup>1</sup>                                                           | Imre Boros (Pankotai et al., 2013)          |
| <i>ada2b</i> <sup>1</sup> , <i>FRT82B</i>       | <i>ada2b</i> , <i>FRT82B</i> stock for somatic mosaic analysis                                                                                                      | <i>ada2b</i> <sup>1</sup> , <i>P</i> { <i>ry</i> <sup>+17.2</sup> = <i>neoFRT</i> }82B/ <i>TM3</i> , <i>Sb</i> <sup>1</sup> <i>Ser</i> <sup>1</sup> | (Stegeman et al., 2016)                     |
| <i>Ada2b</i> -PA                                | Transgene expressing Ada2b-PA isoform under <i>ada2b</i> promoter/enhancer                                                                                          | <i>yw</i> ; <i>P</i> { <i>w</i> <sup>+mC</sup> = <i>ADA2B-PA_ada2bEN</i> }attP40                                                                    | This study.                                 |
| <i>Ada2b</i> -PB                                | Transgene expressing Ada2b-PB isoform under <i>ada2b</i> promoter/enhancer                                                                                          | <i>yw</i> ; <i>P</i> { <i>w</i> <sup>+mC</sup> = <i>ADA2B-PB_ada2bEN</i> }attP40                                                                    | (Weake et al., 2011)                        |
| <i>chiffon</i> <sup>ETBE3</sup>                 | Null <i>chiffon</i> allele that deletes <i>chiffon</i> coding region: chr2L: 16344400 - 16351631                                                                    | <i>chif</i> <sup>ETBE3</sup> / <i>CyO</i>                                                                                                           | John Tower (Landis and Tower, 1999)         |
| <i>chiffon</i> <sup>ETBE3</sup> , <i>FRT40A</i> | <i>chiffon</i> , <i>FRT40A</i> stock for somatic mosaic analysis                                                                                                    | <i>chif</i> <sup>ETBE3</sup> , <i>P</i> { <i>ry</i> <sup>+17.2</sup> = <i>neoFRT</i> }40A/ <i>CyO</i>                                               | (Stephenson et al., 2015)                   |
| <i>Df</i> (2L)RA5                               | Deficiency spans 35E1 – 36A1 including <i>chiffon</i> and <i>cactus</i> genes                                                                                       | <i>Df</i> (2L)RA5/ <i>CyO</i>                                                                                                                       | Bloomington BL6915 (Landis and Tower, 1999) |
| <i>chiffon</i> <sup>DsRed</sup>                 | CRISPR-Cas9 allele replaces <i>chiffon</i> coding region with 3xP3-DsRed marker: chr2L: 16344356 - 16349852                                                         | <i>chif</i> <sup>DsRed-attP</sup> / <i>CyO</i>                                                                                                      | This study                                  |
| <i>Chiffon</i> -FL                              | Transgene expressing full-length Chiffon (1 – 1695aa) under <i>chiffon</i> 3' and 5' regulatory elements                                                            | <i>y w</i> ; <i>P</i> { <i>w</i> <sup>+mC</sup> = <i>Chiffon-FL</i> <sup>1-1695</sup> - <i>NHACFLAG_chifp</i> }attP2                                | This study                                  |
| <i>Chiffon</i> -C                               | Transgene expressing C-terminal domain Chiffon (401 – 1695aa) under <i>chiffon</i> 3' and 5' regulatory elements                                                    | <i>y w</i> ; <i>P</i> { <i>w</i> <sup>+mC</sup> = <i>Chiffon</i> <sup>401-1695</sup> - <i>NHACFLAG_chifp</i> }attP2                                 | This study                                  |
| <i>Chiffon</i> -N                               | Transgene expressing N-terminal domain Chiffon (1 – 375aa) under <i>chiffon</i> 3' and 5' regulatory elements                                                       | <i>y w</i> ; <i>P</i> { <i>w</i> <sup>+mC</sup> = <i>Chiffon</i> <sup>1-400</sup> - <i>NHACFLAG_chifp</i> }attP2                                    | This study                                  |
| <i>Chiffon</i> -FL <sup>WF24</sup>              | Transgene expressing full-length Chiffon (1 – 1695aa) containing nonsense mutation at 174aa (c.520C>T; p.174Q>X) under <i>chiffon</i> 3' and 5' regulatory elements | <i>y w</i> ; <i>P</i> { <i>w</i> <sup>+mC</sup> = <i>Chiffon-FL</i> <sup>WF24</sup> - <i>NHACFLAG_chifp</i> }attP2                                  | This study                                  |
| <i>Chiffon</i> -FL*                             | Transgene expressing full-length Chiffon (1 – 1695aa)                                                                                                               | <i>y w</i> ; <i>P</i> { <i>w</i> <sup>+mC</sup> = <i>Chiffon-FL</i> *- <i>NHACFLAG_chifp</i> }attP2                                                 | This study                                  |



|                                   |                                                                                                                |                                                                                                                         |                    |
|-----------------------------------|----------------------------------------------------------------------------------------------------------------|-------------------------------------------------------------------------------------------------------------------------|--------------------|
|                                   | containing nonsense mutation at 376aa (c.1127C>A; p.376S>X) under <i>chiffon</i> 3' and 5' regulatory elements |                                                                                                                         |                    |
| <i>hs-FLP; FRT40A, ubi-nlsGFP</i> | Heat-shock FLP, FRT40A GFP stock for somatic mosaic analysis                                                   | $y^1 w^{1118}$<br>$P\{ry^{+7.2}=70FLP\}3F;P\{w^{+mC}=Ubi-GFP(S65T)nls\}2L$<br>$P\{ry^{+7.2}=neoFRT\}40A$                | This study         |
| <i>FRT40A; ey-FLP.N</i>           | FRT40A control stock for somatic mosaic analysis                                                               | $w^{1118};$<br>$P\{ry^{+7.2}=neoFRT\}40A;$<br>$P\{ry^{+7.2}=ey-FLP.N\}6, ry^{506}$                                      | Bloomington BL8212 |
| <i>ey-FLP;;FRT82B</i>             | FRT82B control stock for somatic mosaic analysis                                                               | $y^{d2} w^{1118} P\{ry^{+7.2}=ey-FLP.N\}2 P\{GMR-lacZ.C(38.1)\}TPN1;;P\{ry^{+7.2}=neoFRT\}82B$                          | Bloomington BL5619 |
| <i>hs-FLP;;FRT82B, ubi-nlsGFP</i> | Heat-shock FLP, FRT28B GFP stock for somatic mosaic analysis                                                   | $y^1 w^{1118}$<br>$P\{ry^{+7.2}=70FLP\}3F;;P\{ry^{+7.2}=neoFRT\}82B$<br>$P\{w^{+mC}=Ubi-GFP(S65T)nls\}3R/TM6C,$<br>$Sb$ | Scott Hawley       |

Abbreviations: c., cDNA; p., protein

## SUPPLEMENTAL REFERENCES FOR TABLE S2

**Landis, G. and Tower, J.** (1999). The *Drosophila* *chiffon* gene is required for chorion gene amplification, and is related to the yeast Dbf4 regulator of DNA replication and cell cycle. *Development* **126**, 4281-93.

**Pankotai, T., Zsindely, N., Vamos, E. E., Komonyi, O., Bodai, L. and Boros, I. M.** (2013). Functional characterization and gene expression profiling of *Drosophila melanogaster* short dADA2b isoform-containing dSAGA complexes. *BMC Genomics* **14**, 44.

**Qi, D., Larsson, J. and Mannervik, M.** (2004). *Drosophila* Ada2b is required for viability and normal histone H3 acetylation. *Mol Cell Biol* **24**, 8080-9.

**Stegeman, R., Spreacker, P. J., Swanson, S. K., Stephenson, R., Florens, L., Washburn, M. P. and Weake, V. M.** (2016). The Spliceosomal Protein SF3B5 is a Novel Component of *Drosophila* SAGA that Functions in Gene Expression Independent of Splicing. *J Mol Biol* **428**, 3632-49.

**Stephenson, R., Hosler, M. R., Gavande, N. S., Ghosh, A. K. and Weake, V. M.** (2015). Characterization of a *Drosophila* ortholog of the Cdc7 kinase: a role for Cdc7 in endoreplication independent of Chiffon. *J Biol Chem* **290**, 1332-47.

**Weake, V. M., Dyer, J. O., Seidel, C., Box, A., Swanson, S. K., Peak, A., Florens, L., Washburn, M. P., Abmayr, S. M. and Workman, J. L.** (2011). Post-transcription initiation function of the ubiquitous SAGA complex in tissue-specific gene activation. *Genes Dev* **25**, 1499-509.
